# Supplementary material
Source: Springer Nature journal article supplement (https://www.springermedizin.de/resource/supplementary/12936_2009_884_MOESM4_ESM.pdf/9548456)
Supplement: MOESM4 [file 9548456]

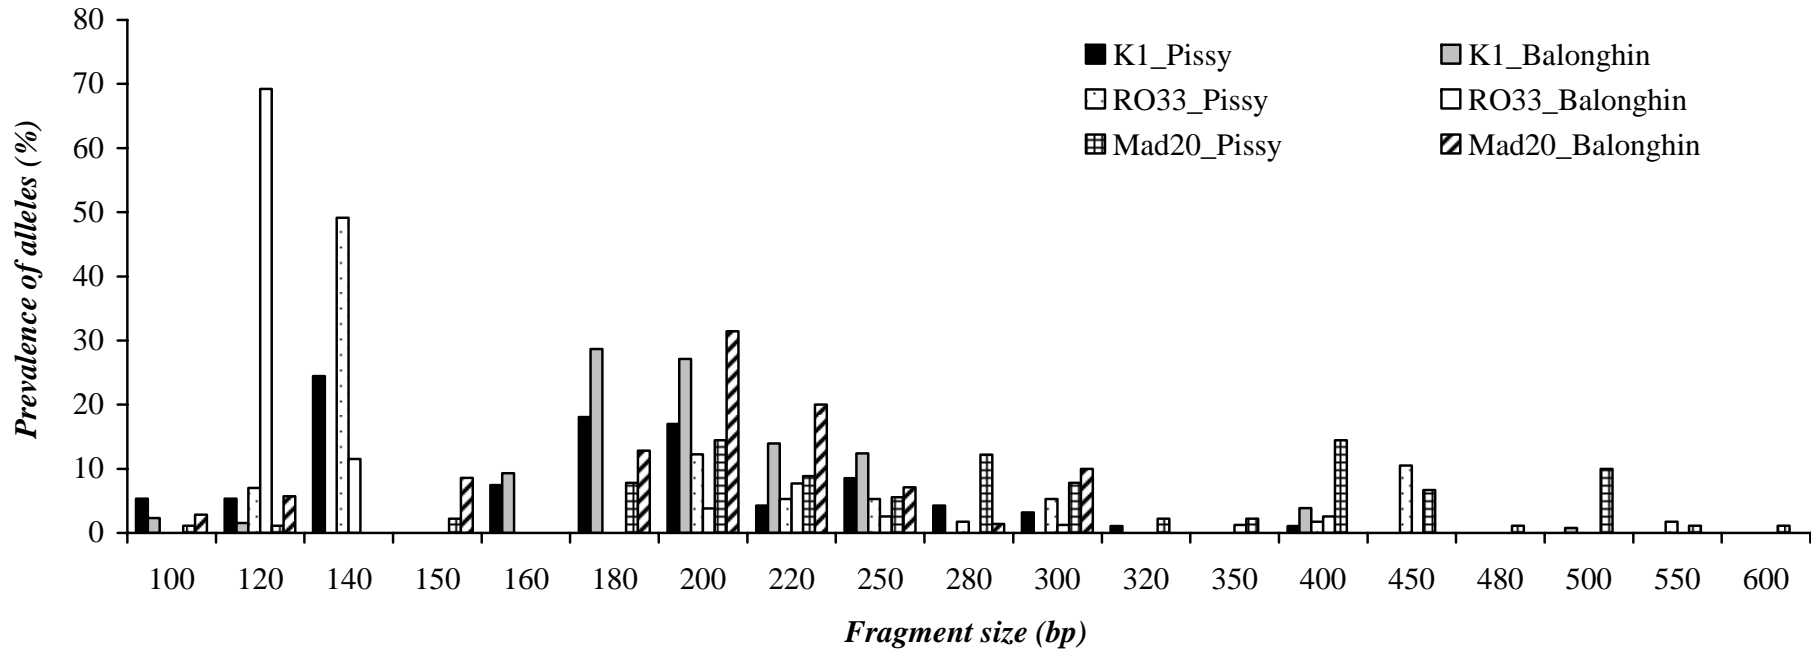

**Figure 3:** Prevalence of *P. falciparum* K1, RO33 and Mad20 *msp1* alleles classified by length (in base pairs) in rural and urban area
